# Supplementary material for: The identification and characterisation of autophagy inhibitors from the published kinase inhibitor sets
Source: PubMed Central journal article supplement (PMC7054748; doi:10.1042/bcj20190846), 2020-02-27
Supplement: BCJ-477-801-s1.pdf [file BCJ-477-801-s1.pdf]

# Supplementary Figure 1

**a**

**GW301784X**

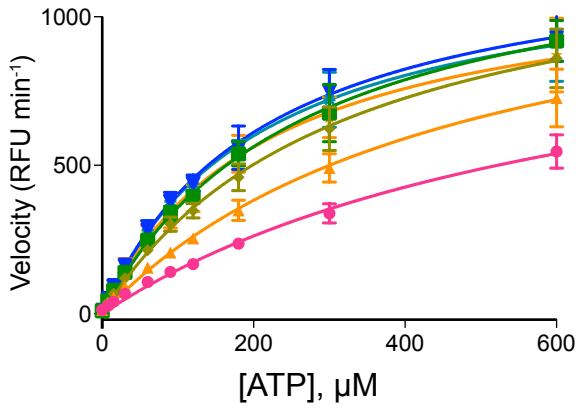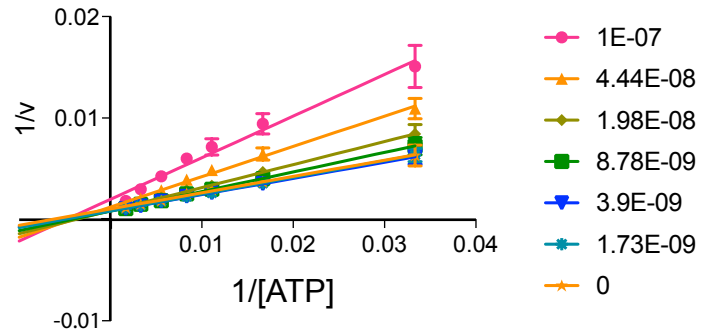

**b**

**GW837331X**

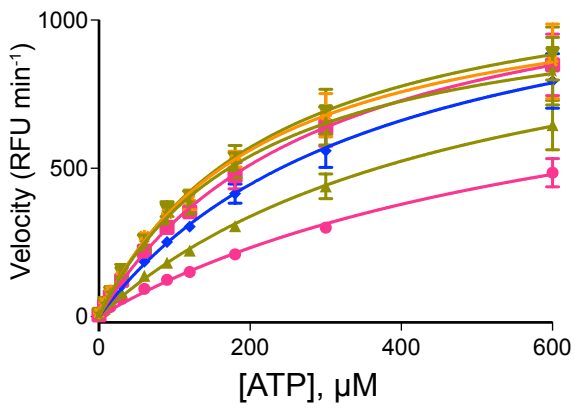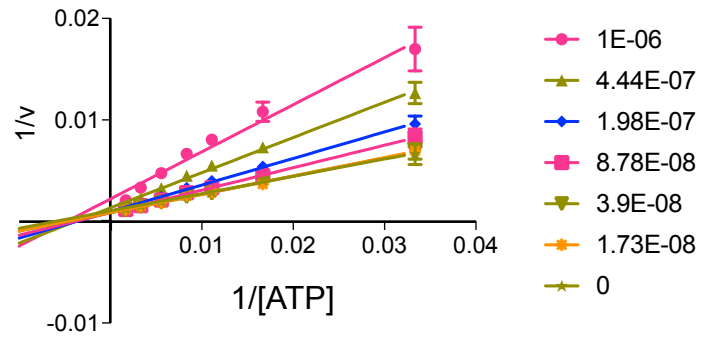

Supplementary figure 1: Michaelis-Menten and Lineweaver-Burke plots showing inhibition of ULK1 by (a) GW301784X and (b) GW837331X at varying concentrations of ATP. The data show the average of three independent experiments; error bars indicate the standard deviation.

# Supplementary Figure 2

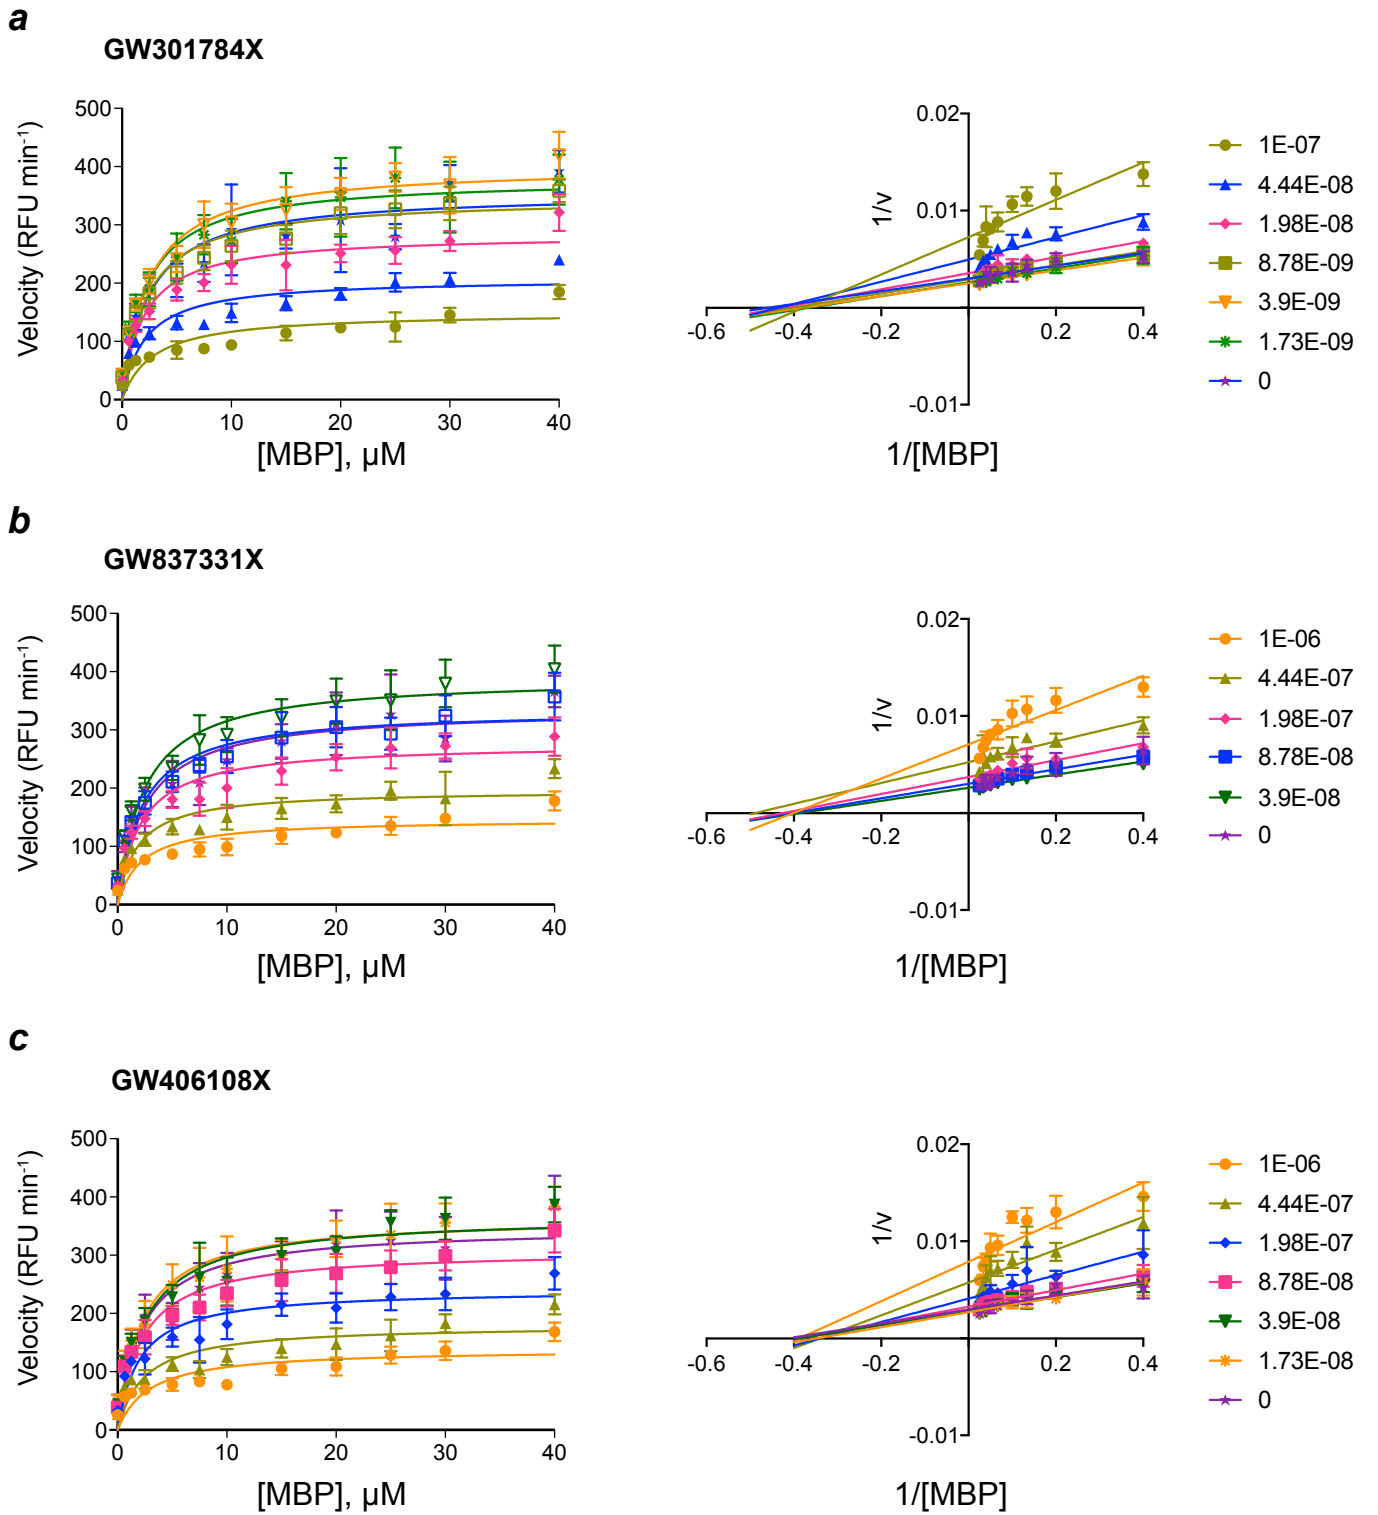

Supplementary figure 2: Michaelis-Menten and Lineweaver-Burke plots showing inhibition of ULK1 by (a) GW301784X, (b) GW837331X and (c) GW406108X at varying concentrations of MBP. The data show the average of three independent experiments; error bars indicate the standard deviation.

# Supplementary Figure 3

**a**

**GSK846226A**

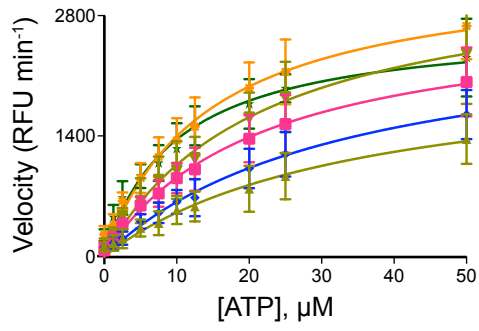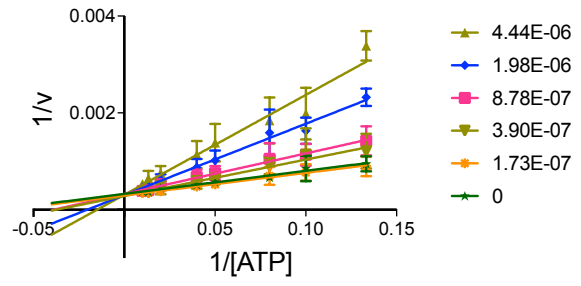

**b**

**GW429374A**

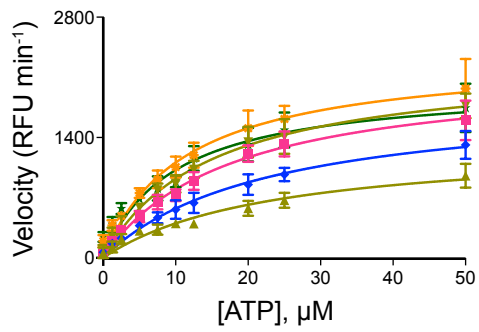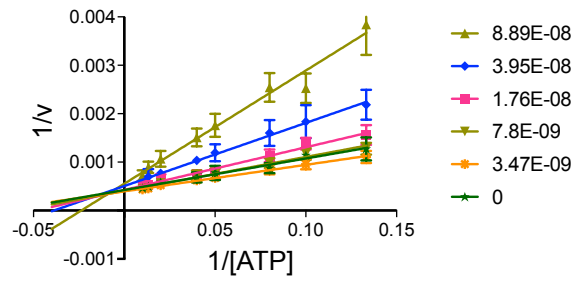

Supplementary figure 3: Michaelis-Menten and Lineweaver-Burke plots showing inhibition of VPS34 by (a) GSK846226A and (b) GW429374A at varying concentrations of ATP. The data show the average of three independent experiments; error bars indicate the standard deviation.

# Supplementary Figure 4

**a**

**GSK2358994A**

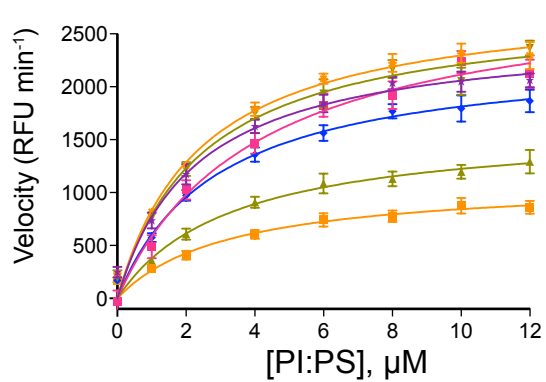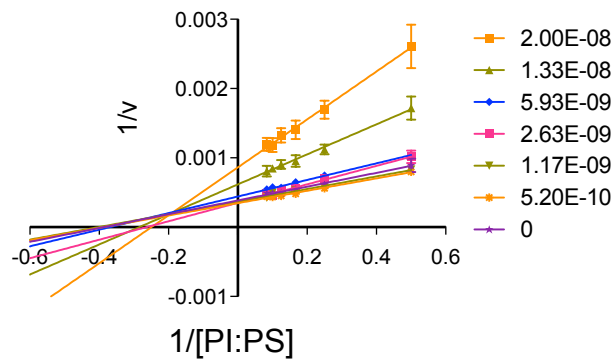

**b**

**GSK846226A**

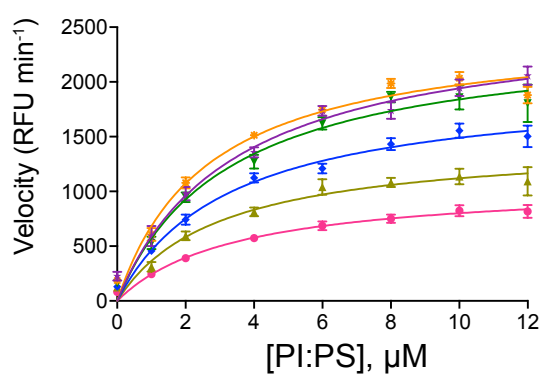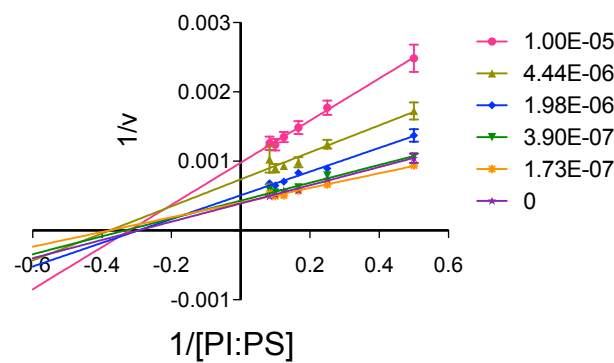

**c**

**GW429374A**

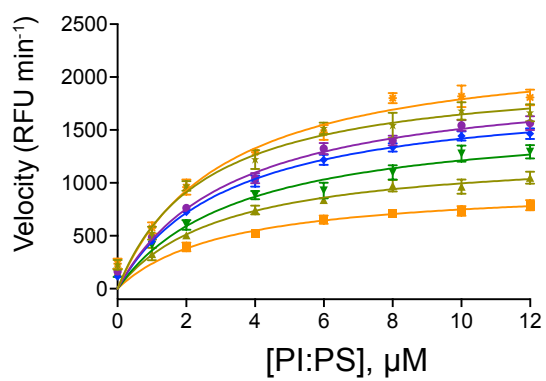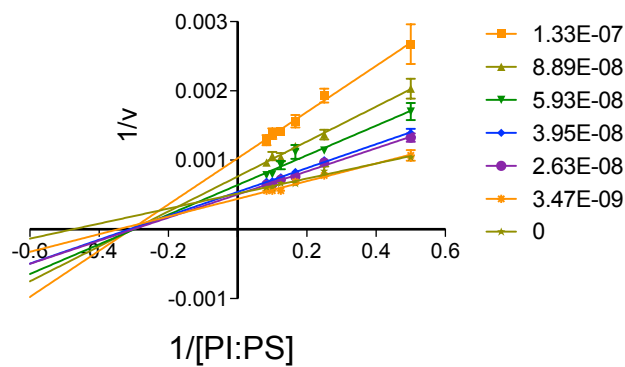

Supplementary figure 4: Michaelis-Menten and Lineweaver-Burke plots showing inhibition of VPS34 by (a) GSK2358994A, (b) GSK846226A and (c) GW429374A at varying concentrations of PI:PS. The data show the average of three independent experiments; error bars indicate the standard deviation.



# Supplementary figure 5

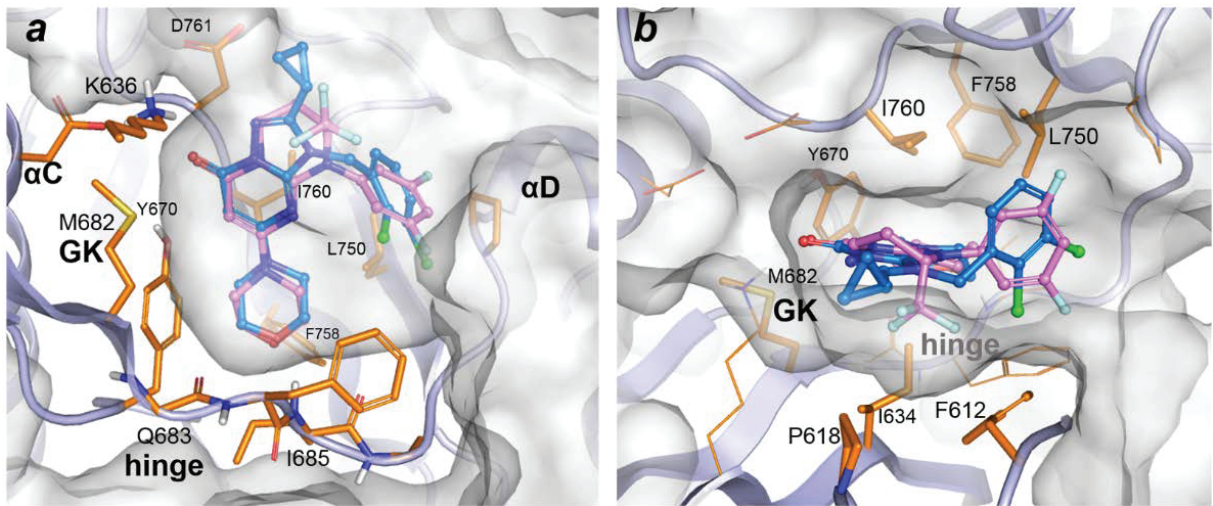

Supplementary figure 5: Superimposition of the docking pose of VPS34 inhibitor GSK2358994A (blue) and the X-ray structure of the morpholine analogue from 4UWF PDB entry (pink) in (a) lateral view and (b) top view.



Supplementary figure 6: (a) U2OS cells were pre-treated for 60 min with 2  $\mu$ M MRT68921 or 5  $\mu$ M SBI0206965, 5  $\mu$ M GW837331X or 5  $\mu$ M GW406108X, following 120 min treatment with EBSS, as indicated. Cells were subsequently fixed and stained for endogenous LC3 (green) and DAPI (blue). Scale bar 10 $\mu$ m. (b) Quantification of LC3 puncta using Volocity and manual quantification of % of cells with enlarged LC3-stained autophagosomes. Graph bars represent mean of n=3 experiments  $\pm$  SEM and statistics were carried out using one-way ANOVA and Dunnett's post-hoc test (graph representing number of LC3 puncta) or one-way ANOVA and Turkey's post-hoc test (graph representing % of cells with enlarged LC3-stained autophagosomes). \*  $p \leq 0.05$  and \*\*  $p \leq 0.01$ . (c) U2OS cells were treated as in (a). Cells were then subjected to western blot analysis with antibodies against the indicated proteins.

# Supplementary Figure 7

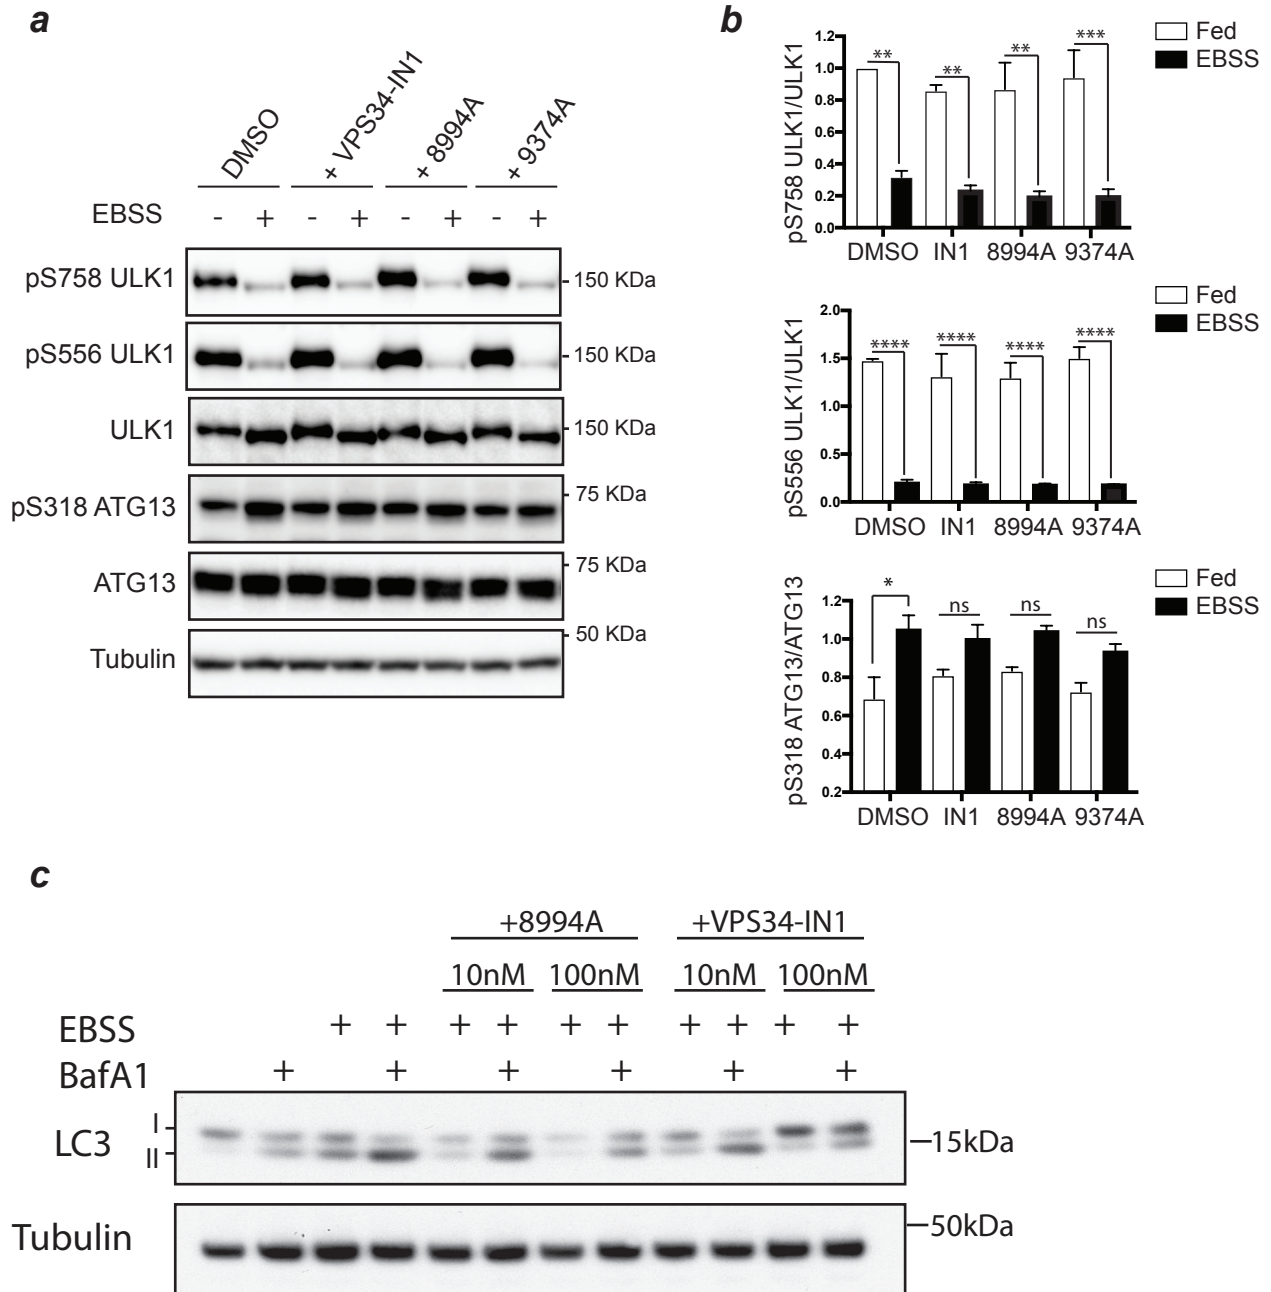

Supplementary figure 7: (a) U2OS cells were pre-treated for 60 min with 500 nM VPS34-IN1, 100 nM GSK2358994A or 100 nM GW429374A, following treatment with or without EBSS for 60 min, as indicated. Cells were subsequently subjected to western blot analysis with antibodies against the indicated proteins. (b) Quantification of pS758 ULK1 normalised to total ULK1 levels, pS556 ULK1 normalised to total ULK1 levels and pS318 ATG13 normalised to total ATG13 levels. Graph bars represent mean of n=3 experiments and statistics were carried out using one-way ANOVA and Turkey's post-hoc test. \*  $p \leq 0.05$ , \*\*  $p \leq 0.01$ , \*\*\*  $p \leq 0.001$ , \*\*\*\*  $p \leq 0.0001$  and ns = non-significant. (c) U2OS cells were pre-treated for 60 min with or without 10 nM or 100nM of GSK2358994A or VPS34-IN1 as indicated following 60 min treatment with or without EBSS and 50 nM BafA1. Cells were next subjected to western blot analysis with antibodies against LC3 and Tubulin.

**Supplementary table 1**

| <b>GW301784X</b> | <b>GW837331X</b> | <b>GW406108X</b> | <b>GSK2358994A</b> | <b>GW429374A</b> | <b>GSK846226A</b> |
|------------------|------------------|------------------|--------------------|------------------|-------------------|
| CDK2             | NEK9             | CLK2             | PKCd               | IKKe             | IKKb              |
| CDK3             | PLK1             | TNK1             |                    | HGK              | JAK2              |
| MST1             | FMS              | DYRK1B           |                    | AurA             | ROCK2             |
| TTK              | SRC              | PKCb             |                    | CLK2             | PKACa             |
| MST2             | MELK             | DYRK1A           |                    | MINK             | ROCK1             |
| CDK5             | EphB2            | GSK3B            |                    | TNK1             | TRKA              |
| MELK             | EphA4            | HGK              |                    | PKCb             | AurC              |
| PDGFRb           |                  | FMS              |                    | DYRK1A           | SRPK1             |
| AMPK $\alpha$ 1  |                  | GSK3A            |                    | GPRK7            | DAPK1             |
| GSK3B            |                  | PKCa             |                    | SRM              | CLK3              |
| GSK3A            |                  | AurA             |                    | PKCa             |                   |
| TBK1             |                  | JAK3             |                    |                  |                   |
| PDGFRa           |                  | MST1             |                    |                  |                   |
| CLK2             |                  | MST2             |                    |                  |                   |
| IKKe             |                  | CLK3             |                    |                  |                   |
| AurA             |                  | KIT              |                    |                  |                   |
| KDR              |                  | MINK             |                    |                  |                   |
| CDK4             |                  | SRM              |                    |                  |                   |
| FYN              |                  | RET              |                    |                  |                   |
| MARK1            |                  | CK2a1            |                    |                  |                   |
| BRSK2            |                  | GPRK7            |                    |                  |                   |
|                  |                  | HIPK1            |                    |                  |                   |
|                  |                  | PIM3             |                    |                  |                   |
|                  |                  | IKKe             |                    |                  |                   |

Supplementary table 1: List of kinases that are inhibited over 50% with each of the inhibitors shown (descending order). Kinase inhibition data extracted from the ChEMBL database (<https://www.ebi.ac.uk/chembl/>).
